# Supplementary material
Source: PubMed Central journal article supplement (PMC3798038)
Supplement: NIHMS482129-supplement-1.pdf [file NIHMS482129-supplement-1.pdf]

---

1 **Appendix A: Relationship between Conditional Variances in the Parameter Space**

2 **and  $\theta$ -space**

3 Using the search function in eq. (5), for each  $N$  sampled value of  $\theta_i$   $\{\theta_i^{(1)}, \dots, \theta_i^{(N)}\}$ ,

4 we can draw the corresponding sampled values of the parameter  $x_i$   $\{x_i^{(1)}, \dots, x_i^{(N)}\}$ .

5 Combining all parameters together assuming parameter independence, for  $N$  random

6 samples

7 
$$\begin{bmatrix} \theta_1^{(1)} & \dots & \theta_n^{(1)} \\ \vdots & \ddots & \vdots \\ \theta_1^{(N)} & \dots & \theta_n^{(N)} \end{bmatrix}$$

8 drawn from the  $\theta$ -space ( $K_\theta^n = \{\theta_1, \dots, \theta_n \mid 0 < \theta_i < 2\pi, i=1, \dots, n\}$ ), we can get  $N$

9 corresponding random samples for the parameters using the search function of eq.

10 (5)

11 
$$\begin{bmatrix} x_1^{(1)} & \dots & x_n^{(1)} \\ \vdots & \ddots & \vdots \\ x_1^{(N)} & \dots & x_n^{(N)} \end{bmatrix},$$

12 and  $N$  corresponding random samples of model output  $\{y^{(1)}, \dots, y^{(N)}\}$  with

13 
$$y^{(j)} = g(G(\theta_1^{(j)}), \dots, G(\theta_n^{(j)})), j=1, \dots, N.$$

14 Using the  $N$  samples from the  $\theta$ -space, we can get an estimate of the  $m^{\text{th}}$  moment

15 for the model output  $y$ ,

16 
$$\frac{1}{N} \sum_{j=1}^N (y^{(j)})^m = \frac{1}{N} \sum_{j=1}^N g(x_1^{(j)}, \dots, x_n^{(j)})^m = \frac{1}{N} \sum_{j=1}^N g(G(\theta_1^{(j)}), \dots, G(\theta_n^{(j)}))^m. \quad (\text{A1})$$

17 It is notable that the random samples drawn from the  $\theta$ -space can ergodically

18 explore the parameter space. Based on the Strong Law of Large Numbers, we have

---


$$\lim_{N \rightarrow \infty} \frac{1}{N} \sum_{j=1}^N (y^{(j)})^m = E(y)^m,$$

$$\lim_{N \rightarrow \infty} \frac{1}{N} \sum_{j=1}^N g(x_1^{(j)}, \dots, x_n^{(j)})^m = E_x(g(x_1^{(j)}, \dots, x_n^{(j)}))^m$$

$$= \iiint_{x_1, \dots, x_n} g^m(x_1, \dots, x_n) f(x_1, \dots, x_n) dx_1 \cdots dx_n, \quad (\text{A2})$$

$$\lim_{N \rightarrow \infty} \frac{1}{N} \sum_{j=1}^N g(G(\theta_1^{(j)}), \dots, G(\theta_n^{(j)}))^m = E_\theta(g(G(\theta_1^{(j)}), \dots, G(\theta_n^{(j)}))^m$$

$$= \left(\frac{1}{2\pi}\right)^n \iiint_{\theta_1, \dots, \theta_n} g^m(G(\theta_1), \dots, G(\theta_n)) d\theta_1 \cdots d\theta_n$$

where  $f(x_1, \dots, x_n)$  is the joint probability density function for the set of parameters.

Thus, based on eq. (A1) and eq. (A2), we have

$$E(y)^m = E_x(g(x_1^{(j)}, \dots, x_n^{(j)}))^m = E_\theta(g(G(\theta_1^{(j)}), \dots, G(\theta_n^{(j)}))^m. \quad (\text{A3})$$

Based on eq. (A3), it is clear that

$$V(y) = V^{(x_1, \dots, x_n)} = V_x(g(x_1^{(j)}, \dots, x_n^{(j)})) = V_\theta(g(G(\theta_1^{(j)}), \dots, G(\theta_n^{(j)}))) \quad (\text{A4})$$

Eq. (A4) shows that the variance of the model output  $y$  can be estimated in the

$\theta$ -space. For the conditional variances in eq. (6), we first consider the expected value

of  $y$  in the parameter space and  $\theta$ -space,

$$\begin{aligned} u_x(x_{sub}) &= E_x(y | x_{sub}) \\ u_\theta(\theta_{sub}) &= E_\theta(y | \theta_{sub}) \end{aligned} \quad (\text{A5})$$

where  $x_{sub}$  is a subset of all parameters  $\{x_1, \dots, x_n\}$  with size less than  $n$ ; and  $\theta_{sub}$  is

a subset of  $\{\theta_1, \dots, \theta_n\}$  corresponding to  $x_{sub}$ . For a specific value  $\theta_{sub} = \theta_{sub}^{(*)}$ , based

on eq. (5), we get  $x_{sub} = x_{sub}^{(*)}$ . It can be shown that

$$E_\theta(y | \theta_{sub} = \theta_{sub}^{(*)}) = E_x(y | x_{sub} = x_{sub}^{(*)}). \quad (\text{A6})$$

15

---

16 **Proof:**

17 By drawing  $N$  samples for  $\theta_{-sub}$  (the set of  $\{\theta_1, \dots, \theta_n\}$  excluding  $\theta_{sub}$ ) and the

1 corresponding sample for  $x_{-sub}$  (the set of  $\{x_1, \dots, x_n\}$  excluding  $x_{sub}$ ) using the search  
 2 function of eq. (5), the sample mean of  $y | \theta_{sub} = \theta_{sub}^{(*)}$  and  $y | x_{sub} = x_{sub}^{(*)}$  can be  
 3 calculated by

$$4 \quad \frac{1}{N} \sum_{j=1}^N (g(\bar{G}(\theta_{-sub}^{(j)}), \bar{G}(\theta_{sub}^{(*)}))) = \frac{1}{N} \sum_{j=1}^N (g(x_{-sub}^{(j)}, x_{sub}^{(*)})) \quad (A7)$$

5 where  $\theta_{-sub}^{(j)}$  is the  $j^{\text{th}}$  sample for  $\theta_{-sub}$  and  $x_{-sub}^{(j)}$  is the corresponding sample  
 6 for  $x_{-sub}$ . The  $\bar{G}(\theta_{-sub})$  is a vector version of the search function of eq. (5). For  
 7 example, if  $\theta_{-sub} = \{\theta_i, \theta_j\}$ , then  $\bar{G}(\theta_{-sub}) = \{G(\theta_i), G(\theta_j)\}$ . Based on the Strong Law  
 8 of Large Numbers, we have

$$9 \quad \begin{aligned} \text{Lim}_{N \rightarrow \infty} \frac{1}{N} \sum_{j=1}^N g(\bar{G}(\theta_{-sub}^{(j)}), \bar{G}(\theta_{sub}^{(*)})) &= E_{\theta}(y | \theta_{sub} = \theta_{sub}^{(*)}) \\ \text{Lim}_{N \rightarrow \infty} \frac{1}{N} \sum_{j=1}^N g(x_{-sub}^{(j)}, x_{sub}^{(*)}) &= E_x(y | x_{sub} = x_{sub}^{(*)}) \end{aligned} \quad (A8)$$

10 Based on eq. (A7) and eq. (A8), we prove eq. (A6).

11

12 To calculate the variance of  $u_{\theta}(\theta_{sub})$  and  $u_x(x_{sub})$ , we first look at the expected value  
 13 of the  $m^{\text{th}}$  moment of  $u_{\theta}(\theta_{sub})$  and  $u_x(x_{sub})$  (i.e.,  $E[u_x(x_{sub})]^m$  and  $E[u_{\theta}(\theta_{sub})]^m$ ).  
 14  $E[u_x(x_{sub})]^m$  and  $E[u_{\theta}(\theta_{sub})]^m$  can be estimated by drawing  $N$  random samples for  
 15  $\theta_{sub} \{\theta_{sub}^{(1)}, \dots, \theta_{sub}^{(N)}\}$  and the corresponding samples for  $x_{sub} \{x_{sub}^{(1)}, \dots, x_{sub}^{(N)}\}$  by  
 16 the search function in eq. (5). Namely,

$$17 \quad \begin{aligned} \hat{E}[u_x(x_{sub})]^m &= \frac{1}{N} \sum_{j=1}^N (u_x(x_{sub}^{(j)}))^m \\ \hat{E}[u_{\theta}(\theta_{sub})]^m &= \frac{1}{N} \sum_{j=1}^N (u_{\theta}(\theta_{sub}^{(j)}))^m. \end{aligned} \quad (A9)$$

18 Based on eq. (A6), the sample averages in eq. (A9) are equal. Namely,

---

1 
$$\frac{1}{N} \sum_{j=1}^N (u_x(x_{sub}^{(j)}))^m = \frac{1}{N} \sum_{j=1}^N (u_\theta(\theta_{sub}^{(j)}))^m. \quad (\text{A10})$$

2 Using the Strong Law of Large Numbers, we have

3 
$$\lim_{N \rightarrow \infty} \frac{1}{N} \sum_{j=1}^N (u_x(x_{sub}^{(j)}))^m = E_x(u_x(x_{sub}))^m, \quad (\text{A11})$$

4 
$$\lim_{N \rightarrow \infty} \frac{1}{N} \sum_{j=1}^N (u_\theta(\theta_{sub}^{(j)}))^m = E_\theta(u_\theta(\theta_{sub}))^m.$$

4 Using eq. (A10) and (A11), we get

5 
$$E_x(u_x(x_{sub}))^m = E_\theta(u_\theta(\theta_{sub}))^m. \quad (\text{A12})$$

6 Based on eq. (A12), it is clear that

7 
$$V^{(x_{sub})} = V_x(E_x(y | x_{sub})) = V_\theta(E_\theta(y | \theta_{sub})). \quad (\text{A13})$$

8 Eq. (A13) indicates that the conditional variance of the expected value of model  
 9 output  $y$  in the parameters space is equal to that in the  $\theta$ -space.
