# Supplementary material
Source: PubMed Central journal article supplement (PMC3798038)
Supplement: NIHMS482129-supplement-2.pdf [file NIHMS482129-supplement-2.pdf]

1 **Appendix B: Partial Variance Calculations in the  $\theta$ -space**

2 Based on eq. (6),  $V^{(x_i)} = V_\theta(E_\theta(y | \theta_i))$ . To calculate  $V^{(x_i)}$ , we first calculate

$$3 \quad \begin{aligned} E_\theta(y | \theta_i) &= E(g(G(\theta_1), \dots, G(\theta_n)) | \theta_i) \\ &= \int_0^{2\pi} \dots \int_0^{2\pi} f(\theta_1, \dots, \theta_{i-1}, \theta_{i+1}, \dots, \theta_n | \theta_i) g(G(\theta_1), \dots, G(\theta_n)) d\theta_1 \dots d\theta_{i-1} d\theta_{i+1} \dots d\theta_n. \end{aligned}$$

4 where  $f(\theta_1, \dots, \theta_{i-1}, \theta_{i+1}, \dots, \theta_n | \theta_i)$  is the conditional probability density function of

5  $(\theta_1, \dots, \theta_{i-1}, \theta_{i+1}, \dots, \theta_n)$  given  $\theta_i$ . Since  $\theta_1, \dots, \theta_n$  are independently and uniformly

6 distributed between 0 and  $2\pi$ , we have

$$7 \quad E_\theta(y | \theta_i) = \left(\frac{1}{2\pi}\right)^{n-1} \int_0^{2\pi} \dots \int_0^{2\pi} g(G(\theta_1), \dots, G(\theta_n)) d\theta_1 \dots d\theta_{i-1} d\theta_{i+1} \dots d\theta_n$$

8 Using the multiple Fourier transformation in eq. (12), we get

$$9 \quad E_\theta(y | \theta_i) = \left(\frac{1}{2\pi}\right)^{n-1} \int_0^{2\pi} \dots \int_0^{2\pi} \sum_{r_1, \dots, r_n = -\infty}^{+\infty} C_{r_1, \dots, r_n} e^{i(r_1\theta_1 + \dots + r_n\theta_n)} d\theta_1 \dots d\theta_{i-1} d\theta_{i+1} \dots d\theta_n.$$

10 In view that

$$11 \quad \int_0^{2\pi} e^{i(r_i\theta_i)} d\theta_i = 0,$$

12 we get

$$13 \quad E_\theta(y | \theta_i) = \sum_{r_i = -\infty}^{+\infty} C_{0 \dots r_i \dots 0} e^{i(r_i\theta_i)}. \quad (\text{B1})$$

14 Based on Parseval's theorem

$$15 \quad E_{\theta_i}(E_\theta(y | \theta_i))^2 = \sum_{r_i = -\infty}^{+\infty} |C_{0 \dots r_i \dots 0}|^2 \quad (\text{B2})$$

16 In view that

$$17 \quad \begin{aligned} E(C_{0 \dots r_i \dots 0} e^{i(r_i\theta_i)}) &= \frac{1}{2\pi} \int_0^{2\pi} C_{0 \dots r_i \dots 0} e^{i(r_i\theta_i)} d\theta_i \\ &= \begin{cases} 0, & r_i \neq 0 \\ C_{0 \dots 0 \dots 0}, & r_i = 0, \end{cases} \end{aligned}$$

18 we have

$$19 \quad E_{\theta_i}(E_\theta(y | \theta_i)) = C_{0 \dots 0 \dots 0}. \quad (\text{B3})$$

1 Based on eq. (B2) and eq. (B3), we have

$$2 \quad V^{(x_i)} = V_\theta(E_\theta(y | \theta_i)) = \sum_{|r_i|=1}^{+\infty} |C_{0 \dots r_i \dots 0}^{(\theta)}|^2. \quad (\text{B4})$$

3 For the partial variance contributed by uncertainties in parameters  $x_i$  and  $x_j$ ,

4  $V^{(x_i, x_j)} = V_\theta(E_\theta(y | \theta_i, \theta_j))$ , we first calculate

$$5 \quad \begin{aligned} E_\theta(y | \theta_i, \theta_j) &= E(g(G(\theta_1), \dots, G(\theta_n)) | \theta_i, \theta_j) \\ &= \int_0^{2\pi} \dots \int_0^{2\pi} f((\theta_1, \dots, \theta_n \setminus \theta_i, \theta_j) | \theta_i, \theta_j) g(G(\theta_1), \dots, G(\theta_n)) (d\theta_1 \dots d\theta_n \setminus d\theta_i d\theta_j). \end{aligned}$$

6 where  $(\setminus)$  represents all the elements in the first term excluding the elements in the

7 second term and  $f((\theta_1, \dots, \theta_n \setminus \theta_i, \theta_j) | \theta_i, \theta_j)$  is the conditional probability density

8 function of  $(\theta_1, \dots, \theta_n \setminus \theta_i, \theta_j)$  given  $(\theta_i, \theta_j)$ . Since  $\theta_1, \dots, \theta_n$  are independently and

9 uniformly distributed, we have

$$10 \quad E_\theta(y | \theta_i, \theta_j) = \left(\frac{1}{2\pi}\right)^{n-2} \int_0^{2\pi} \dots \int_0^{2\pi} g(G(\theta_1), \dots, G(\theta_n)) (d\theta_1 \dots d\theta_n \setminus d\theta_i d\theta_j).$$

11 Using the multiple Fourier transformation in eq. (6), we get

$$12 \quad \begin{aligned} E_\theta(y | \theta_i, \theta_j) &= \left(\frac{1}{2\pi}\right)^{n-2} \int_0^{2\pi} \dots \int_0^{2\pi} \sum_{r_1, \dots, r_n = -\infty}^{+\infty} C_{r_1, \dots, r_n}^{(\theta)} e^{i(r_1\theta_1 + \dots + r_n\theta_n)} (d\theta_1 \dots d\theta_n \setminus d\theta_i d\theta_j) \\ &= \sum_{r_i, r_j = -\infty}^{+\infty} C_{0 \dots r_i \dots r_j \dots 0}^{(\theta)} e^{i(r_i\theta_i + r_j\theta_j)}. \end{aligned}$$

13 Similar to the Parseval's theorem, we can show that

$$14 \quad \begin{aligned} &E_{\theta_i, \theta_j} (E_\theta(y | \theta_i, \theta_j))^2 \\ &= \left(\frac{1}{2\pi}\right)^2 \int_0^{2\pi} \int_0^{2\pi} \left( \sum_{r_i, r_j = -\infty}^{+\infty} C_{0 \dots r_i \dots r_j \dots 0} e^{i(r_i\theta_i + r_j\theta_j)} \right) \left( \sum_{l_i, l_j = -\infty}^{+\infty} \bar{C}_{0 \dots l_i \dots l_j \dots 0} e^{-i(l_i\theta_i + l_j\theta_j)} \right) d\theta_i d\theta_j \\ &= \left(\frac{1}{2\pi}\right)^2 \left\{ \int_0^{2\pi} \int_0^{2\pi} \sum_{r_i, r_j = -\infty}^{+\infty} |C_{0 \dots r_i \dots r_j \dots 0}|^2 d\theta_i d\theta_j \right. \\ &\quad \left. + \sum_{l_i, l_j, r_i, r_j = -\infty, l_i \neq r_i \text{ or } l_j \neq r_j}^{+\infty} \int_0^{2\pi} \int_0^{2\pi} C_{0 \dots r_i \dots r_j \dots 0} e^{i(r_i\theta_i + r_j\theta_j)} \bar{C}_{0 \dots l_i \dots l_j \dots 0} e^{-i(l_i\theta_i + l_j\theta_j)} d\theta_i d\theta_j \right\}, \end{aligned}$$

15 where  $\bar{C}_{0 \dots r_i \dots r_j \dots 0}$  indicates the conjugate of  $C_{0 \dots r_i \dots r_j \dots 0}$ . Using the fact that

$$\begin{aligned}
& \int_0^{2\pi} \int_0^{2\pi} C_{0 \dots r_i \dots r_j \dots 0} e^{i(r_i \theta_i + r_j \theta_j)} \bar{C}_{0 \dots l_i \dots l_j \dots 0} e^{-i(l_i \theta_i + l_j \theta_j)} d\theta_i d\theta_j, l_i \neq r_i \text{ or } l_j \neq r_j \\
& = C_{0 \dots r_i \dots r_j \dots 0} \bar{C}_{0 \dots l_i \dots l_j \dots 0} \int_0^{2\pi} e^{i(r_i - l_i) \theta_i} d\theta_i \int_0^{2\pi} e^{i(r_j - l_j) \theta_j} d\theta_j \\
& = 0,
\end{aligned}$$

we have

$$E_{\theta_i, \theta_j} (E_{\theta} (y | \theta_i, \theta_j))^2 = \sum_{r_i, r_j = -\infty}^{+\infty} |C^{(\theta)}_{0 \dots r_i \dots r_j \dots 0}|^2. \quad (\text{B5})$$

Based on eq. (B3) and eq. (B5), we have

$$\begin{aligned}
V^{(x_i, x_j)} & = V_{\theta} (E_{\theta} (y | \theta_i, \theta_j)) \\
& = \sum_{|r_i|, |r_j|=1}^{+\infty} |C^{(\theta)}_{0 \dots r_i \dots r_j \dots 0}|^2 + \sum_{|r_i|=1}^{+\infty} |C^{(\theta)}_{0 \dots r_i \dots 0}|^2 + \sum_{|r_j|=1}^{+\infty} |C^{(\theta)}_{0 \dots \dots r_j \dots 0}|^2
\end{aligned} \quad (\text{B6})$$

Using eq. (8), eq. (B4) and eq. (B6), it is clear that

$$\begin{aligned}
V_{x_i x_j} & = V^{(x_i, x_j)} - V_{x_i} - V_{x_j} \\
& = \sum_{|r_i|, |r_j|=1}^{+\infty} |C^{(\theta)}_{0 \dots r_i \dots r_j \dots 0}|^2.
\end{aligned} \quad (\text{B7})$$

Using similar equations as eq. (B5) and eq. (B6), it can also be shown that

$$\begin{aligned}
V_{x_i x_j x_k} & = \sum_{|r_i|, |r_j|, |r_k|=1}^{+\infty} |C^{(\theta)}_{00 \dots r_i \dots r_j \dots r_k \dots 00}|^2 \\
& \dots \\
V_{x_1 \dots x_n} & = \sum_{|r_1|, \dots, |r_n|=1}^{+\infty} |C^{(\theta)}_{r_1 \dots \dots r_n}|^2.
\end{aligned} \quad (\text{B8})$$
