# Supplementary material
Source: PubMed Central journal article supplement (PMC3798038)
Supplement: NIHMS482129-supplement-3.pdf [file NIHMS482129-supplement-3.pdf]

---

1 **Appendix C: Estimation Errors of Fourier Coefficients over the Auxiliary Variable  $s$**

2 The rectangle rule is a numerical approach to calculate the integral of a function  
3  $\psi(s)$ . For the calculation of Fourier coefficients over the auxiliary variable  $s$  in eq.  
4 (23), we have  $\psi(s) = g(G(s))\cos(ks)$  or  $\psi(s) = g(G(s))\sin(ks)$ . The rectangle rule  
5 first divides the range of  $s$  (in this paper,  $s$  is between 0 and  $2\pi$ ) into  $N$  small equal  
6 intervals. Each interval will form a rectangle with height determined by  $f(s)$  at the mid  
7 points of the interval (see Figure C1 for a better understanding). Then the integral  
8  $(\int_0^{2\pi} \psi(s)ds)$  is approximated by the sum of areas of rectangles. Mathematically, the  
9 integral can be calculated as follows,

10 
$$\int_0^{2\pi} \psi(s)ds = \frac{2\pi}{N} \sum_{j=1}^N \psi(s^{(j)}) \quad (C1)$$

11 where  $\frac{2\pi}{N}$  is the rectangle width and  $s^{(j)}$  is the mid-point at the  $j$ th interval  
12 defined by the grid samples in eq. (19). Using eq. (C1), it can be easily shown that the  
13 Fourier coefficients over the auxiliary variable  $s$  in eq. (23) can be calculated using  
14 the rectangle rule as follows

15 
$$\frac{1}{2\pi} \int_0^{2\pi} g(G(\varphi(\omega_1 s)), \dots, G(\varphi(\omega_n s))) \cos(ks) ds = \frac{1}{N} \sum_{j=1}^N g(G(\varphi(\omega_1 s^{(j)})), \dots, G(\varphi(\omega_n s^{(j)}))) \cos(ks^{(j)})$$
  
$$\frac{1}{2\pi} \int_0^{2\pi} g(G(\varphi(\omega_1 s)), \dots, G(\varphi(\omega_n s))) \sin(ks) ds = \frac{1}{N} \sum_{j=1}^N g(G(\varphi(\omega_1 s^{(j)})), \dots, G(\varphi(\omega_n s^{(j)}))) \sin(ks^{(j)}).$$

16 Thus, the sample mean based on grid samples in eq. eq. (26) is equivalent to the  
17 numerical integral using the rectangle rule. If  $\psi(s)$  is differentiable to the  
18 second-order, the estimation error ( $e$ ) for the numerical integral using the rectangle  
19 rule decays as the square of interval length (Davis and Rabinowitz 1984).

20 Mathematically, we have

---

1 
$$e \leq \frac{\Delta^2(b-a)}{24} \max_{s \in [0, 2\pi]} \psi''(s)$$

2 where  $\Delta$  is the interval length; a is the lower range of integral; and b is the upper  
 3 range of integral; and  $\psi''(s)$  is the second derivative. For s between 0 and  $2\pi$ , we  
 4 have

5 
$$e \leq \frac{\pi^3}{3N^2} \max_{s \in [0, 2\pi]} \psi''(s) \tag{C2}$$

6 which suggests that the estimation error decays at a rate of  $1/N^2$  with an increasing  
 7 sample size.

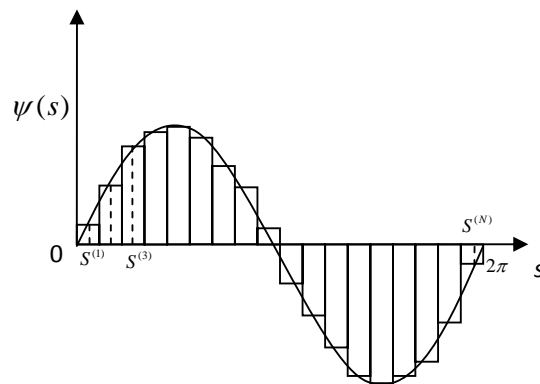

8  
 9 Figure C1 Illustration of the numerical integral using the rectangle rule.

10  
 11 **References**

12 Davis, P. J., and P. Rabinowitz. 1984. Methods of numerical integration, 2nd edition.  
 13 Academic Press, Orlando.
