# Supplementary material
Source: PubMed Central journal article supplement (PMC3798038)
Supplement: NIHMS482129-supplement-4.pdf [file NIHMS482129-supplement-4.pdf]

1 **Appendix D: Relationships between Fourier Coefficients over the Auxiliary Variable**  
2 **s and Fourier Coefficients in the  $\theta$ -space**

3 Note that this derivation is based on Cukier et al. (1978). However, the original  
4 proof in Cukier et al. (1978) only examined the relationship between Fourier  
5 coefficients over the auxiliary variable  $s$  and Fourier coefficients in the  $\theta$ -space for  
6 frequencies which are harmonics of assigned fundamental frequency of model  
7 parameters (i.e.,  $k = r_i^{(s)} \omega_i$ ). In this derivation, we generalize the relationship for all  
8 frequencies (i.e.,  $k = \sum_i r_i^{(s)} \omega_i$ ), so that we are able to calculate higher-order  
9 sensitivity indices in the sampling scheme based on auxiliary variable  $s$ .

10 Based on eq.(25), the Fourier coefficient at frequency  $k = \sum_i r_i^{(s)} \omega_i = \bar{r} \cdot \bar{\omega}^T$   
11 [where  $\bar{r} = (r_1^{(s)}, \dots, r_j^{(s)}, \dots, r_n^{(s)})$  and  $\bar{\omega} = (\omega_1, \dots, \omega_n)$ ] over the auxiliary variable  $s$  can  
12 be calculated as follows,

$$13 \quad C_{(\bar{r} \cdot \bar{\omega}^T)}^{(s)} = E_s (g(G(\varphi(\omega_1 s)), \dots, G(\varphi(\omega_n s))) e^{-i(\sum_i r_i^{(s)} \omega_i) s})$$

14 Following Cukier et al. (1978), replace the multiple Fourier transformation of  
15  $g(G(\theta_1), \dots, G(\theta_n))$  in eq. (12) into above equation, we have

$$16 \quad \begin{aligned} C_{(\bar{r} \cdot \bar{\omega}^T)}^{(s)} &= E_s \left\{ \left[ \sum_{r_1^{(\theta)}, \dots, r_n^{(\theta)} = -\infty}^{+\infty} C_{r_1^{(\theta)} \dots r_n^{(\theta)}}^{(\theta)} e^{i(r_1^{(\theta)} \omega_1 + \dots + r_n^{(\theta)} \omega_n) s} \right] e^{-i(\sum_i r_i^{(s)} \omega_i) s} \right\} \\ &= \sum_{r_1^{(\theta)}, \dots, r_n^{(\theta)} = -\infty}^{+\infty} E_s \left[ C_{r_1^{(\theta)} \dots r_n^{(\theta)}}^{(\theta)} e^{i(r_1^{(\theta)} \omega_1 + \dots + r_n^{(\theta)} \omega_n) s} e^{-i(\sum_i r_i^{(s)} \omega_i) s} \right] \\ &= \sum_{r_1^{(\theta)}, \dots, r_n^{(\theta)} = -\infty}^{+\infty} E_s \left[ C_{r_1^{(\theta)} \dots r_n^{(\theta)}}^{(\theta)} e^{i[(r_1^{(\theta)} \omega_1 + \dots + r_n^{(\theta)} \omega_n) - (\sum_i r_i^{(s)} \omega_i)] s} \right]. \end{aligned}$$

17 If  $\left[ (r_1^{(\theta)} \omega_1 + \dots + r_n^{(\theta)} \omega_n) - (\sum_i r_i^{(s)} \omega_i) \right] = 0$ , we have

$$18 \quad E_s \left[ C_{r_1^{(\theta)} \dots r_n^{(\theta)}}^{(\theta)} e^{i[(r_1^{(\theta)} \omega_1 + \dots + r_n^{(\theta)} \omega_n) - (\sum_i r_i^{(s)} \omega_i)] s} \right] = C_{r_1^{(\theta)} \dots r_n^{(\theta)}}^{(\theta)}.$$

1 If  $\left[ (r_1^{(\theta)} \omega_1 + \dots + r_n^{(\theta)} \omega_n) - (\sum_i r_i^{(s)} \omega_i) \right] \neq 0$ , we have

$$\begin{aligned}
 & E_s \left[ C_{r_1^{(\theta)} \dots r_n^{(\theta)}}^{(\theta)} e^{i[(r_1^{(\theta)} \omega_1 + \dots + r_n^{(\theta)} \omega_n) - (\sum_i r_i^{(s)} \omega_i)]s} \right] \\
 & = C_{r_1^{(\theta)} \dots r_n^{(\theta)}}^{(\theta)} E_s \left[ e^{i[(r_1^{(\theta)} \omega_1 + \dots + r_n^{(\theta)} \omega_n) - (\sum_i r_i^{(s)} \omega_i)]s} \right] \\
 & = 0.
 \end{aligned}$$

3 Finally, Fourier coefficient at frequency  $k = \bar{r} \cdot \bar{\omega}^T$  over the auxiliary variable  $s$  can  
 4 be approximated by the Fourier coefficients in the  $\theta$ -space as follows,

$$5 \quad C_{(\bar{r} \cdot \bar{\omega}^T)}^{(s)} = C_{\bar{r}}^{(\theta)} + \sum_{\bar{r}'} C_{\bar{r}'}^{(\theta)}, \quad (D1)$$

6 where  $\bar{r}'$  is a vector different from  $\bar{r}$  (i.e.,  $\bar{r} \neq \bar{r}'$ ) with  $\bar{r} \cdot \bar{\omega}^T = \bar{r}' \cdot \bar{\omega}^T$ . If a frequency  
 7 set  $\{\omega_1, \dots, \omega_n\}$  is strictly free of interferences as defined in eq. (21), then

$$8 \quad \bar{r} \cdot \bar{\omega}^T \neq \bar{r}' \cdot \bar{\omega}^T, \text{ for } 1 \leq r_i \leq M \text{ and } 0 \leq r_j' \leq M.$$

9 Thus, for  $\bar{r}' = (r_1', \dots, r_j', \dots, r_n')$  in eq. (D1), there is at least one  $r_j' > M$ , for  $j = 1, \dots, n$ .

10 Since the higher order harmonics is negligible (i.e.,  $C_{\bar{r}'}^{(\theta)} \approx 0$  for any of  $r_j' > M$ ), we  
 11 can approximate  $C_{(\bar{r} \cdot \bar{\omega}^T)}^{(s)}$  using  $C_{\bar{r}}^{(\theta)}$ . Namely,

$$12 \quad C_{(\bar{r} \cdot \bar{\omega}^T)}^{(s)} \approx C_{\bar{r}}^{(\theta)} \quad (D2)$$

13 for a frequency set  $\{\omega_1, \dots, \omega_n\}$  strictly free of interferences to an order of  $M$ .

14

15 **References**

16 Cukier, R. I., H. B. Levine, and K. E. Shuler. 1978. Nonlinear sensitivity analysis of  
 17 multiparameter model systems. Journal of Computational Physics 26:1-42.

18

19
