# Supplementary material
Source: PubMed Central journal article supplement (PMC3798038)
Supplement: NIHMS482129-supplement-5.pdf [file NIHMS482129-supplement-5.pdf]

## 1 Appendix E: Estimation Error of Fourier Coefficients for Simple Random Sampling

2 For the Fourier coefficient defined in eq. (13), we define

$$3 \quad C_{r_1 \dots r_n}^{(\theta)} = a_{r_1 \dots r_n}^{(\theta)} - \mathbf{i} b_{r_1 \dots r_n}^{(\theta)} \quad (\text{E1})$$

4 where  $a_{r_1 \dots r_n}^{(\theta)}$  is the cosine Fourier coefficient and  $b_{r_1 \dots r_n}^{(\theta)}$  is the sine Fourier  
5 coefficient with

$$6 \quad \begin{aligned} a_{r_1 \dots r_n}^{(\theta)} &= \left(\frac{1}{2\pi}\right)^n \int_0^{2\pi} \dots \int_0^{2\pi} g(G(\theta_1), \dots, G(\theta_n)) \text{Cos}(r_1\theta_1 + \dots + r_n\theta_n) d\theta_1 \dots d\theta_n \\ &= E(g(G(\theta_1), \dots, G(\theta_n)) \text{Cos}(r_1\theta_1 + \dots + r_n\theta_n)), \\ b_{r_1 \dots r_n}^{(\theta)} &= \left(\frac{1}{2\pi}\right)^n \int_0^{2\pi} \dots \int_0^{2\pi} g(G(\theta_1), \dots, G(\theta_n)) \text{Sin}(r_1\theta_1 + \dots + r_n\theta_n) d\theta_1 \dots d\theta_n \\ &= E(g(G(\theta_1), \dots, G(\theta_n)) \text{Sin}(r_1\theta_1 + \dots + r_n\theta_n)). \end{aligned} \quad (\text{E2})$$

7 For the estimation of Fourier coefficient  $C_{00 \dots r_1 \dots 00}^{(\theta)}$  in eq.(15), we have

$$8 \quad \hat{C}_{r_1 \dots r_n}^{(\theta)} = \hat{a}_{r_1 \dots r_n}^{(\theta)} - \mathbf{i} \hat{b}_{r_1 \dots r_n}^{(\theta)} \quad (\text{E3})$$

9 where

$$10 \quad \begin{aligned} \hat{a}_{r_1 \dots r_n}^{(\theta)} &= \frac{1}{N} \sum_{j=1}^N [g(G(\theta_1^{(j)}), \dots, G(\theta_n^{(j)})) \text{Cos}(r_1\theta_1^{(j)} + \dots + r_n\theta_n^{(j)})], \\ \hat{b}_{r_1 \dots r_n}^{(\theta)} &= \frac{1}{N} \sum_{j=1}^N [g(G(\theta_1^{(j)}), \dots, G(\theta_n^{(j)})) \text{Sin}(r_1\theta_1^{(j)} + \dots + r_n\theta_n^{(j)})]. \end{aligned} \quad (\text{E4})$$

11 Clearly, both  $\hat{a}_{r_1 \dots r_n}^{(\theta)}$  and  $\hat{b}_{r_1 \dots r_n}^{(\theta)}$  are unbiased estimator in view that

$$12 \quad \begin{aligned} E(\hat{a}_{r_1 \dots r_n}^{(\theta)}) &= a_{r_1 \dots r_n}^{(\theta)}, \\ E(\hat{b}_{r_1 \dots r_n}^{(\theta)}) &= b_{r_1 \dots r_n}^{(\theta)}. \end{aligned} \quad (\text{E5})$$

13 In view that  $\{\theta_1^{(j)}, \dots, \theta_n^{(j)}, j = 1, \dots, N\}$  are random sample drawn in the  $\theta$ -space, the  
14 variance of  $\hat{a}_{r_1 \dots r_n}^{(\theta)}$  [i.e.,  $V(\hat{a}_{r_1 \dots r_n}^{(\theta)})$ ] can be estimated as follows,

$$15 \quad \begin{aligned} V(\hat{a}_{r_1 \dots r_n}^{(\theta)}) &= \frac{1}{N} V[g(G(\theta_1), \dots, G(\theta_n)) \text{Cos}(r_1\theta_1 + \dots + r_n\theta_n)] \\ &= \frac{1}{N} \{E[g^2(G(\theta_1), \dots, G(\theta_n)) \text{Cos}^2(r_1\theta_1 + \dots + r_n\theta_n)] - (a_{r_1 \dots r_n}^{(\theta)})^2\}. \end{aligned} \quad (\text{E6})$$

16 Thus, we can calculate the expected value of  $(\hat{a}_{r_1 \dots r_n}^{(\theta)})^2$  as follows,

1 
$$E(\hat{a}_{r_1 \dots r_n}^{(\theta)})^2 = V(\hat{a}_{r_1 \dots r_n}^{(\theta)}) + E^2(\hat{a}_{r_1 \dots r_n}^{(\theta)}). \quad (E7)$$

2 Based on eq. (E5) and (E6),  $E(\hat{a}_{r_1 \dots r_n}^{(\theta)})^2$  in eq. (E7) can be estimated as follows,

3 
$$E(\hat{a}_{r_1 \dots r_n}^{(\theta)})^2 = \frac{1}{N} \{ E[g^2(G(\theta_1), \dots, G(\theta_n)) \text{Cos}^2(r_1\theta_1 + \dots + r_n\theta_n)] - (a_{r_1 \dots r_n}^{(\theta)})^2 \} + (a_{r_1 \dots r_n}^{(\theta)})^2. \quad (E8)$$

4 Similarly, we can show that the expected value of  $\hat{b}_{r_1 \dots r_n}^{(\theta)}$

5 
$$E(\hat{b}_{r_1 \dots r_n}^{(\theta)})^2 = \frac{1}{N} \{ E[g^2(G(\theta_1), \dots, G(\theta_n)) \text{Sin}^2(r_1\theta_1 + \dots + r_n\theta_n)] - (b_{r_1 \dots r_n}^{(\theta)})^2 \} + (b_{r_1 \dots r_n}^{(\theta)})^2. \quad (E9)$$

6 Based on eq. (E3), (E8) and (E9), the expected value of amplitude  $|\hat{C}_{r_1 \dots r_n}^{(\theta)}|^2$  can be

7 estimated as follows,

8 
$$\begin{aligned} E(|\hat{C}_{r_1 \dots r_n}^{(\theta)}|^2) &= E[(\hat{a}_{r_1 \dots r_n}^{(\theta)})^2 + (\hat{b}_{r_1 \dots r_n}^{(\theta)})^2] \\ &= E[(\hat{a}_{r_1 \dots r_n}^{(\theta)})^2] + E[(\hat{b}_{r_1 \dots r_n}^{(\theta)})^2] \\ &= (a_{r_1 \dots r_n}^{(\theta)})^2 + (b_{r_1 \dots r_n}^{(\theta)})^2 + \delta_e \\ &= |C_{r_1 \dots r_n}^{(\theta)}|^2 + \delta_e \end{aligned} \quad (E10)$$

9 where

10 
$$\begin{aligned} \delta_e &= \frac{1}{N} \{ E[g(G(\theta_1), \dots, G(\theta_n))]^2 - [(a_{r_1 \dots r_n}^{(\theta)})^2 + (b_{r_1 \dots r_n}^{(\theta)})^2] \} \\ &= \frac{1}{N} \{ E[g(G(\theta_1), \dots, G(\theta_n))]^2 - |C_{r_1 \dots r_n}^{(\theta)}|^2 \}. \end{aligned} \quad (E11)$$

11 Based on eq.(E4) and the Central Limit Theorem, for a large sample size  $N$ , the

12 estimation error of Fourier coefficient  $\hat{a}_{r_1 \dots r_n}^{(\theta)}$  and  $\hat{b}_{r_1 \dots r_n}^{(\theta)}$  will follow a normal

13 distribution. Statistically, we have

14 
$$\begin{aligned} \hat{a}_{r_1 \dots r_n}^{(\theta)} &\sim \ddot{N}(a_{r_1 \dots r_n}^{(\theta)}, V(\hat{a}_{r_1 \dots r_n}^{(\theta)})), \\ \hat{b}_{r_1 \dots r_n}^{(\theta)} &\sim \ddot{N}(b_{r_1 \dots r_n}^{(\theta)}, V(\hat{b}_{r_1 \dots r_n}^{(\theta)})), \end{aligned} \quad (E12)$$

15 where  $\ddot{N}(u, v)$  represents a normal distribution with mean  $u$  and variance  $v$ . Based

16 on eq. (E6), this suggests that the estimation error for  $C_{r_1 \dots r_n}^{(\theta)}$  decays at a rate of

1  $\frac{1}{\sqrt{N}}$  with an increasing sample size  $N$ .
