# Supplementary material
Source: PubMed Central journal article supplement (PMC3798038)
Supplement: NIHMS482129-supplement-7.pdf [file NIHMS482129-supplement-7.pdf]

---

1 **Appendix G: Variance Decomposition for the Test Model**

2 For the test model in eq. (45), we have the variance of the model output  $y$   
3 decomposed as follows

4 
$$V(y) = \sum_{i=1}^3 i^2 V(x_i^2) + V(x_1 x_2) + 4V(x_2 x_3) + 9V(x_1 x_3) + V(x_1 x_2 x_3) \quad (G1)$$

5 In view that

6 
$$\begin{aligned} Cov(x_i x_j, x_i^2) &= E(x_i^3 x_j) - E(x_i x_j)E(x_i^2) \\ &= E(x_i^3)E(x_j) - E(x_i)E(x_j)E(x_i^2) \\ &= 0. \end{aligned} \quad (G2)$$

7 Since  $x_i$  follows a standard normal distribution,  $x_i^2$  follows a chi-squared  
8 distribution with degree of freedom equal to one. Thus,  $V(x_i^2) = 2$  and

9 
$$V(y) = \sum_{i=1}^3 2i^2 + 1 + 4 + 9 + 1 = 43. \quad (G3)$$

10 For the expected value of  $y$  given a specific parameter  $x_1$ , we have

11 
$$\begin{aligned} E(y|x_1) &= x_1^2 + x_1 E(x_2) + 3x_1 E(x_3) + 2E(x_2^2) + 3E(x_3^2) \\ &= x_1^2 + 5. \end{aligned}$$

12 The variance of  $E(y|x_1)$  then can be calculated as follows,

13 
$$\begin{aligned} V(E(y|x_1)) &= V(x_1^2) \\ &= V(x_1^2) \\ &= 2. \end{aligned} \quad (G4)$$

14 Similarly, we can show that

15 
$$\begin{aligned} V(E(y|x_2)) &= 4V(x_2^2) = 8 \\ V(E(y|x_3)) &= 9V(x_3^2) = 18. \end{aligned} \quad (G5)$$

16 For the expected value of  $y$  given two parameters  $x_1$  and  $x_2$ , we have

17 
$$\begin{aligned} E(y|x_1, x_2) &= x_1^2 + x_1 x_2 + 2E(x_2^2) + 3E(x_3^2) \\ &= x_1^2 + x_1 x_2 + 5. \end{aligned}$$

18 Thus, the variance of the expected value can be calculated as follows,

---

1 
$$V(E(y|x_1, x_2)) = V(x_1^2) + V(x_1x_2) = 2 + 1 = 3. \quad (G6)$$

2 Similarly, we can show that,

3 
$$\begin{aligned} V(E(y|x_1, x_3)) &= 9V(x_3^2) + 9V(x_1x_3) = 27, \\ V(E(y|x_2, x_3)) &= 4V(x_2^2) + 4V(x_2x_3) = 12, \quad (G7) \\ V(E(y|x_1, x_2, x_3)) &= V(y) = 43. \end{aligned}$$

4 Based on eq. (8), we can calculate the partial variances contributed by the main  
5 effects, the second-order interaction effects, and the third-order interaction effects  
6 (see Table 1 for detailed results).
