# Supplementary material
Source: PubMed Central journal article supplement (PMC3798038)
Supplement: NIHMS482129-supplement-8.pdf [file NIHMS482129-supplement-8.pdf]

## 1 Appendix H: Estimation Errors of Sensitivity Indices in Stochastic Models

2 For a stochastic model, we can write the model as

$$3 \quad y = g(x_1, \dots, x_n) + \xi \quad (\text{H1})$$

4 where  $\xi$  is a random error with  $E(\xi) = 0$  and  $V(\xi) = \sigma_e^2$ . Using search functions  
5 with eq. (35), we can transform  $g(x_1, \dots, x_n)$  into a multiple periodic function of  
6 parameters in the  $\theta$ -space [i.e.,  $(\theta_1, \dots, \theta_n)$ ]. Then the multiple Fourier  
7 transformation can be applied to  $g(x_1, \dots, x_n)$  with eq. (12). However, the estimation  
8 of Fourier coefficient  $\hat{C}_{r_1, \dots, r_n}^{(\theta)}$  will have an additional error term ( $C_e$ ) due to the  
9 random noise ( $\xi$ ). Namely,

$$\begin{aligned} \hat{C}_{r_1, \dots, r_n}^{(\theta)} &= \frac{1}{N} \sum_{j=1}^N (g(G(\theta_1^{(j)}), \dots, G(\theta_n^{(j)})) + \xi^{(j)}) e^{-i(r_1 \theta_1^{(j)} + \dots + r_n \theta_n^{(j)})} \\ 10 \quad &= \frac{1}{N} \sum_{j=1}^N [(g(G(\theta_1^{(j)}), \dots, G(\theta_n^{(j)})) e^{-i(r_1 \theta_1^{(j)} + \dots + r_n \theta_n^{(j)})}] + \frac{1}{N} \sum_{j=1}^N \xi^{(j)} e^{-i(r_1 \theta_1^{(j)} + \dots + r_n \theta_n^{(j)})} \\ &= \hat{C}_{r_1, \dots, r_n}^{(\theta, g)} + \hat{C}_e, \end{aligned}$$

11 where

$$\begin{aligned} \hat{C}_{r_1, \dots, r_n}^{(\theta, g)} &= \frac{1}{N} \sum_{j=1}^N [(g(G(\theta_1^{(j)}), \dots, G(\theta_n^{(j)})) e^{-i(r_1 \theta_1^{(j)} + \dots + r_n \theta_n^{(j)})}] \\ 12 \quad \hat{C}_e &= \frac{1}{N} \sum_{j=1}^N \xi^{(j)} e^{-i(r_1 \theta_1^{(j)} + \dots + r_n \theta_n^{(j)})}. \end{aligned}$$

13 Finally, the partial variances contributed by main effects and interaction effects can  
14 be estimated based on eq. (30). Using the Central Limit Theorem, for  $\hat{C}_e = \hat{a}_e - \mathbf{i}\hat{b}_e$ , we

15 have

$$\begin{aligned} \hat{a}_e &\sim \ddot{N}(0, \frac{\sigma_e^2}{2N}), \\ 16 \quad \hat{b}_e &\sim \ddot{N}(0, \frac{\sigma_e^2}{2N}), \end{aligned} \quad (\text{H2})$$

17 where  $\ddot{N}(u, v)$  represents a normal distribution with mean  $u$  and variance  $v$  and

$$1 \quad E \left[ \left| \hat{C}_{r_1, \dots, r_n}^{(\theta)} \right|^2 \right] = E \left[ \left| \hat{C}_{r_1, \dots, r_n}^{(\theta, g)} \right|^2 \right] + \frac{\sigma_e^2}{N}, \quad (\text{H3})$$

2 using the fact that

$$\begin{aligned}
& E \left[ \left| \hat{C}_{r_1, \dots, r_n}^{(\theta)} \right|^2 \right] \\
&= E \left[ \left| \hat{C}_{r_1, \dots, r_n}^{(\theta, g)} + \hat{C}_e \right|^2 \right] \\
3 \quad &= E \left[ \left( \hat{a}_{r_1, \dots, r_n}^{(\theta, g)} + \hat{a}_e \right)^2 + \left( \hat{b}_{r_1, \dots, r_n}^{(\theta, g)} + \hat{b}_e \right)^2 \right] \\
&= E \left( \hat{a}_{r_1, \dots, r_n}^{(\theta, g) 2} + \hat{b}_{r_1, \dots, r_n}^{(\theta, g) 2} \right) + E \left( \hat{a}_e^2 \right) + E \left( \hat{b}_e^2 \right) + 2E \left( \hat{a}_{r_1, \dots, r_n}^{(\theta, g)} \hat{a}_e \right) + 2E \left( \hat{b}_{r_1, \dots, r_n}^{(\theta, g)} \hat{b}_e \right) \\
&= E \left[ \left| \hat{C}_{r_1, \dots, r_n}^{(\theta, g)} \right|^2 \right] + \frac{\sigma_e^2}{N} \text{ with } E \left( \hat{a}_{r_1, \dots, r_n}^{(\theta, g)} \hat{a}_e \right) = 0 \text{ and } E \left( \hat{b}_{r_1, \dots, r_n}^{(\theta, g)} \hat{b}_e \right) = 0.
\end{aligned}$$

4 This shows that there will be an additional bias term  $\frac{\sigma_e^2}{N}$ . If the random noise is very  
5 large, then a very large sample size is needed to identify the partial variances  
6 contributed by different model parameters. Otherwise, they would be difficult to  
7 identify the variance contributions by parameters.

8
