# Supplementary material
Source: PubMed Central journal article supplement (PMC3798038)
Supplement: NIHMS482129-supplement-9.pdf [file NIHMS482129-supplement-9.pdf]

1 **Appendix I: Estimation Error of Sensitivity Indices in Models with Dependent**  
 2 **Parameters**

3 For a model  $y = g(x_1, \dots, x_n)$  with dependent parameters, the model output can be  
 4 decomposed for a subset of independent model parameters ( $x_{sub}$ ) as follows,

5 
$$y = u(x_{sub}) + \xi_{(-x_{sub})}$$

6 where

7 
$$u(x_{sub}) = E(g(x_1, \dots, x_n) | x_{sub})$$

8 and  $\xi_{(-x_{sub})}$  is a random error arising due to uncertainties in all parameters except  
 9  $x_{sub}$  with

10 
$$E(\xi_{(-x_{sub})}) = 0$$

$$V(\xi_{(-x_{sub})}) = V(y) - V(E(g(x_1, \dots, x_n) | x_{sub})).$$

11  $V(\xi_{(-x_{sub})})$  is equal to the partial variance contributed by the subset of dependent  
 12 parameters. In this way, we are able to quantify partial variances in the framework for  
 13 stochastic models in eq. (H1) assuming  $g(x_1, \dots, x_n) = u(x_{sub})$  and  $\xi = \xi_{(-x_{sub})}$ . The  
 14 additional estimation bias introduced by not including the dependent parameters is

15 
$$\frac{V(\xi_{(-x_{sub})})}{N}$$
 (see eq.(H3) in Appendix H in supplementary materials).

16 One key point in the above analysis framework is to draw samples for correlated  
 17 parameters. There were many sampling approaches available (e.g., the Markov Chain  
 18 Monte Carlo and rejection sampling) to draw random samples if we know the joint  
 19 probability density function for all parameters (Liu 2001). However, it could be  
 20 difficult and infeasible to obtain joint distribution estimates for models with many  
 21 parameters (e.g., 100 parameters). Xu and Gertner (2007, 2008a) used a simple

1 random reordering approach to generate samples for parameters with a specific rank  
2 correlation structure. The main idea is that, after generating grid samples for  
3  $(\theta_1, \dots, \theta_n)$  and the corresponding samples for parameters  $(x_1, \dots, x_n)$ , sampled  
4 parameter values are reordered to honor a specified correlation structure using the  
5 Iman and Conover's method (Iman and Conover 1982). Samples of  $(\theta_1, \dots, \theta_n)$  are  
6 reordered correspondingly based on the order of parameter samples. Based on the  
7 reordered samples of  $(\theta_1, \dots, \theta_n)$ , partial variances contributed by main effects as well  
8 as interaction effects within the subset of independent model parameters ( $x_{sub}$ ) can be  
9 estimated with eq. (30). If all parameters are dependent, then  $x_{sub}$  contains only one  
10 parameter and the multiple Fourier transformation for  $u(x_{sub})$  is reduced to a  
11 one-dimensional Fourier transformation with eq. (12).

12 The current framework for models with correlated parameters does not allow for  
13 the calculation of partial variances contributed by interaction effects among correlated  
14 parameters. Since correlations are common in different kinds of models, it would be  
15 desirable to explore interaction effects for correlated parameters using the FAST  
16 framework. Future development to incorporate interaction effects for correlated  
17 parameters will be of interest.

18 There are also other approaches available for conducting sensitivity analysis of  
19 models with dependent parameters (Iman et al. 1985, Bedford 1998, Iman et al. 2002,  
20 Fang et al. 2004, Sulieman et al. 2004, Xu and Gertner 2008b). For a specific  
21 comparison of different approaches for a test model, please refer to Sulieman et al.  
22 (2009).

1 **References**

- 2
- 3 Bedford, T. 1998. Sensitivity indices for (Tree) - dependent variables. Pages 17-20 *in*  
4 Proceedings of the Second International Symposium on Sensitivity Analysis of  
5 Model Output, Venice, Italy.
- 6 Fang, S., G. Z. Gertner, and A. Anderson. 2004. Estimation of sensitivity coefficients  
7 of nonlinear model input parameters which have a multinormal distribution.  
8 Computer Physics Communications 157:9-16.
- 9 Iman, R. L., and W. J. Conover. 1982. A distribution-free approach to inducing rank  
10 correlation among input variables. Communications in Statistics-Simulation  
11 and Computation 11:311-334.
- 12 Iman, R. L., M. E. Johnson, and T. A. Schroeder. 2002. Assessing hurricane effects.  
13 Part 1. Sensitivity analysis. Reliab. Eng. Syst. Safe. 78:131-145.
- 14 Iman, R. L., M. J. Shortencarier, and J. D. Jonson. 1985. A FORTRAN 77 and user's  
15 guide for calculation of partial correlation function and standardized  
16 coefficient. Sandia National Laboratories, Albuquerque, NM.
- 17 Liu, J. S. 2001. Monte Carlo strategies in scientific computing. Springer, New York.
- 18 Sulieman, H., I. Kucuk, and P. J. McLellan. 2009. Parametric sensitivity: A case study  
19 comparison. Comput. Stat. Data. An. 53:2640-2652.
- 20 Sulieman, H., P. J. McLellan, and D. W. Bacon. 2004. A profile-based approach to  
21 parametric sensitivity in multiresponse regression models. Comput. Stat. Data.  
22 An. 45:721-740.
- 23 Xu, C., and G. Z. Gertner. 2007. Extending a global sensitivity analysis technique to  
24 models with correlated parameters. Comput. Stat. Data An. 51:5579-5590.
- 25 Xu, C., and G. Z. Gertner. 2008a. A general first-order global sensitivity analysis  
26 method. Reliab. Eng. Syst. Safe. 93:1060-1071.
- 27 Xu, C., and G. Z. Gertner. 2008b. Uncertainty and sensitivity analysis for models with  
28 correlated parameters. Reliab. Eng. Syst. Safe. 93:1563-1573.
