# Supplementary material
Source: PubMed Central journal article supplement (PMC3798038)
Supplement: NIHMS482129-supplement-10.pdf [file NIHMS482129-supplement-10.pdf]

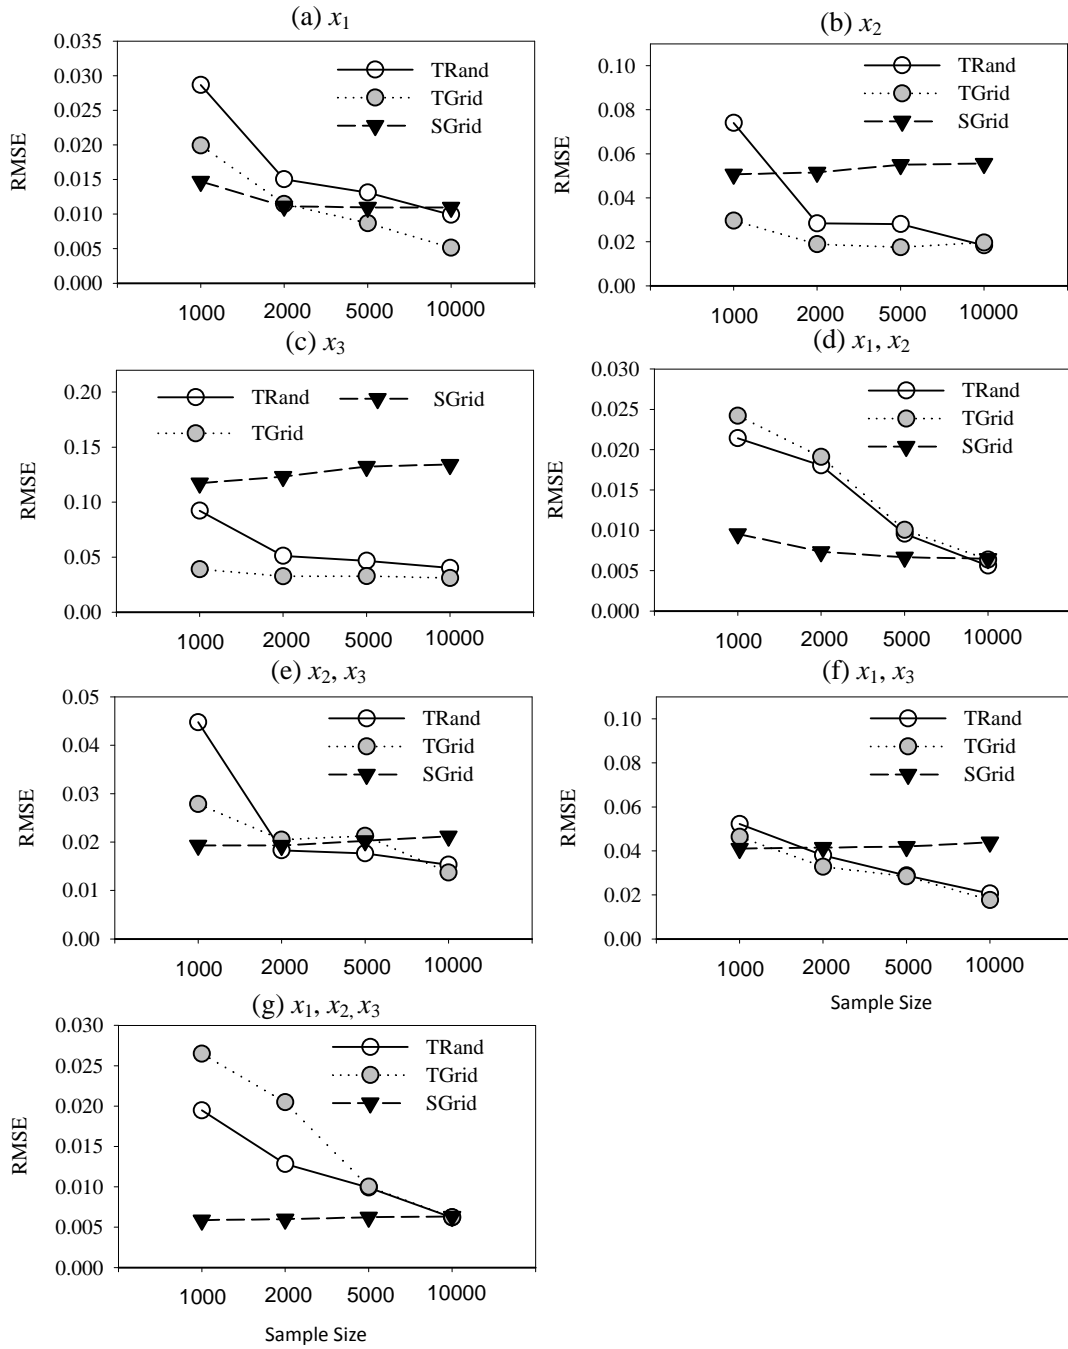

Figure S1 Comparison of different sampling methods (SGrid = search-curve based sampling using the auxiliary variable  $s$ ; TRand = simple random sampling in  $\theta$ -space; TGrid = random balance design sampling in the  $\theta$ -space) for root mean square error (RMSE) with different sample sizes (1000; 2000; 5000; and 10,000).
